# Supplementary figures and images for: Comparison of human amniotic membrane decellularisation approaches for hESC-derived RPE cells culture
Source: HighWire-hosted journal article supplement (doi:10.1136/bmjophth-2022-000981), 2022-09-01

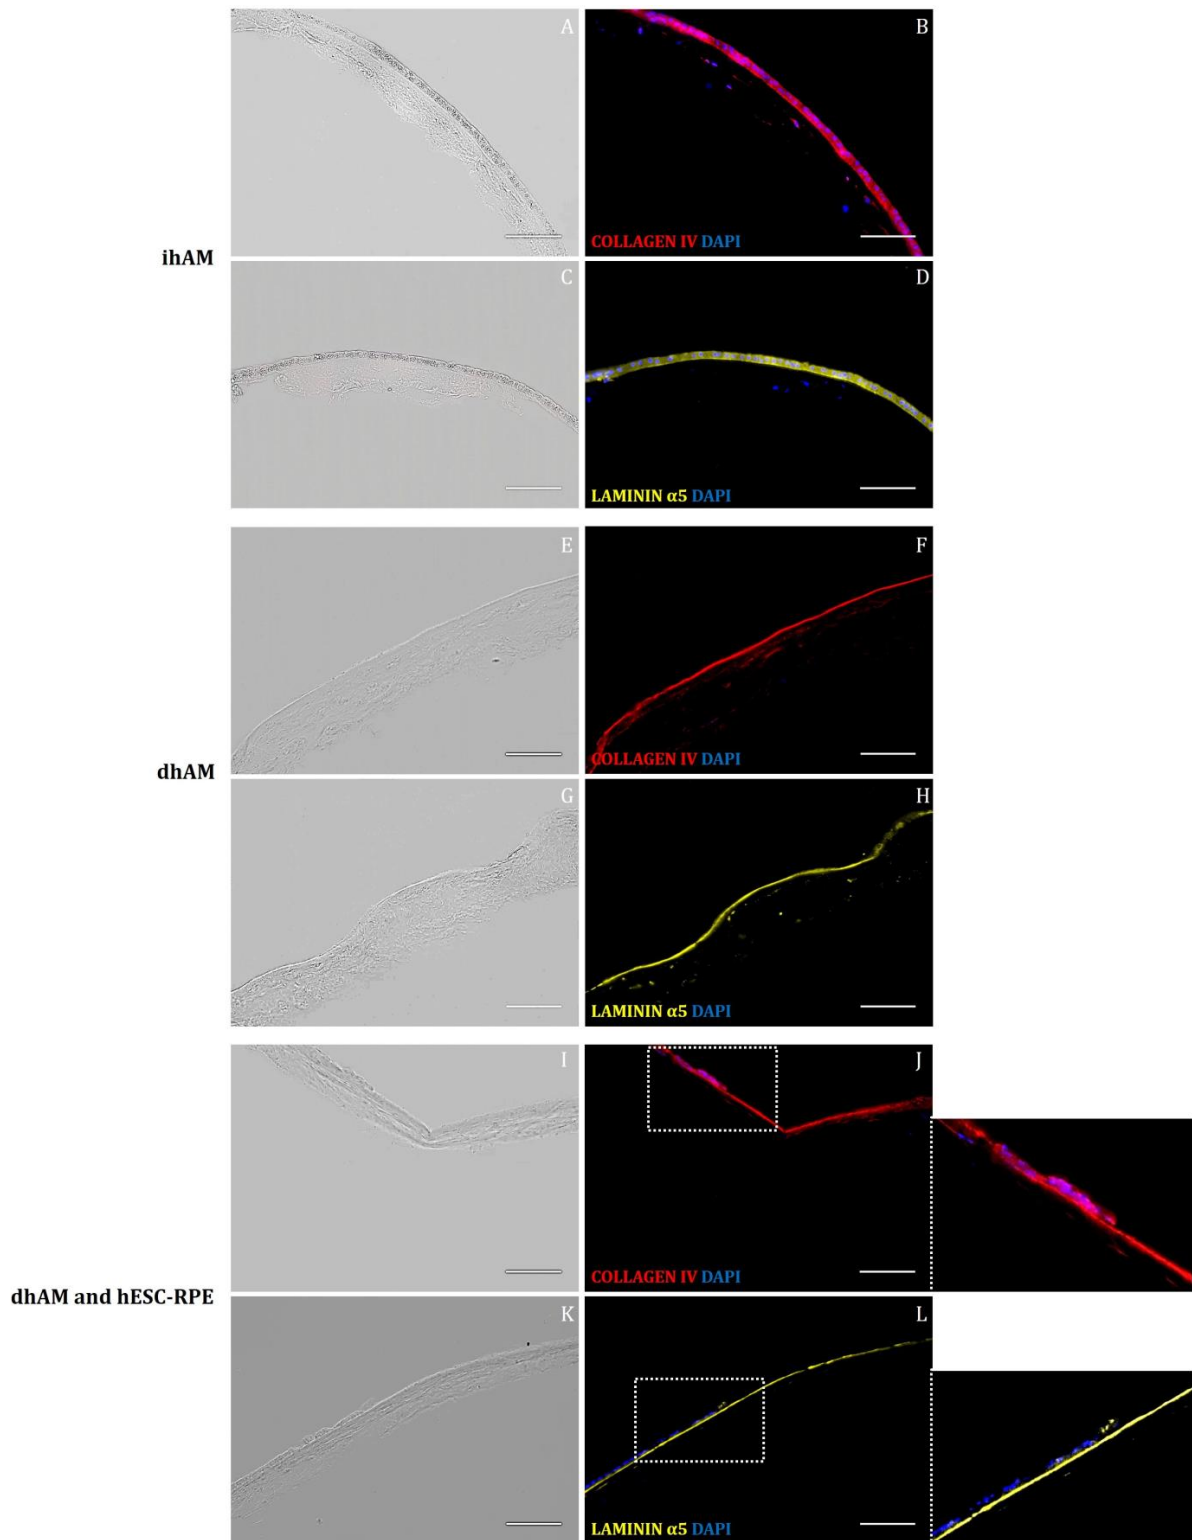

Supplement: bmjophth-2022-000981supp006_data_supplement.pdf [file bmjophth-2022-000981supp006_data_supplement.pdf]

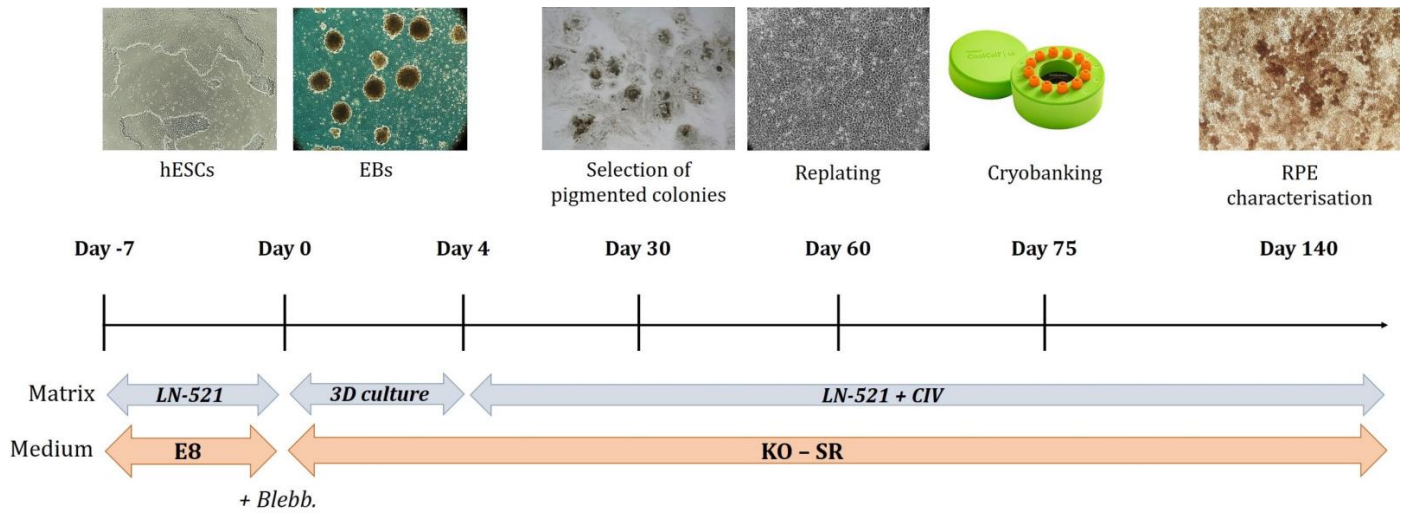

Supplement: bmjophth-2022-000981supp007_data_supplement.pdf [file bmjophth-2022-000981supp007_data_supplement.pdf]

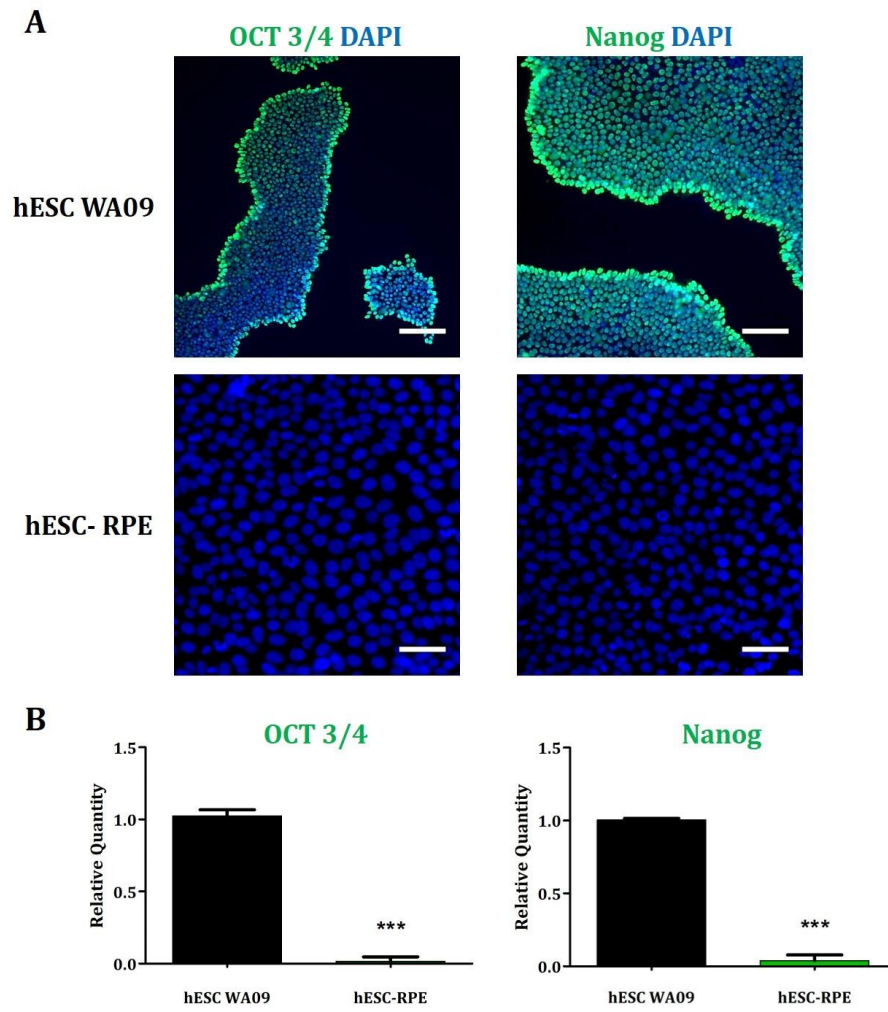

Supplement: bmjophth-2022-000981supp008_data_supplement.pdf [file bmjophth-2022-000981supp008_data_supplement.pdf]

**NaKATPase DAPI**

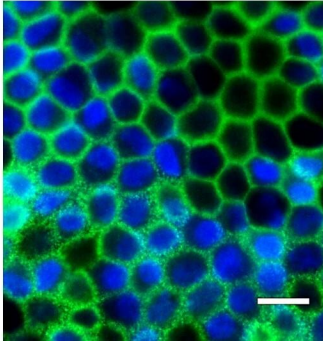

**ZO1 DAPI**

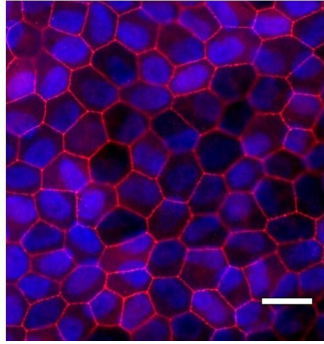

**MERTK DAPI**

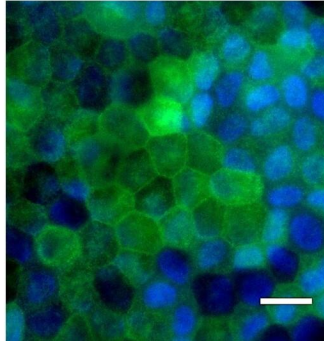

**Best1 DAPI**

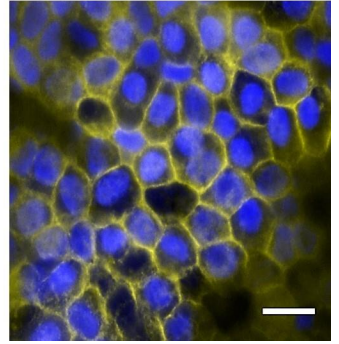

Supplement: bmjophth-2022-000981supp009_data_supplement.pdf [file bmjophth-2022-000981supp009_data_supplement.pdf]

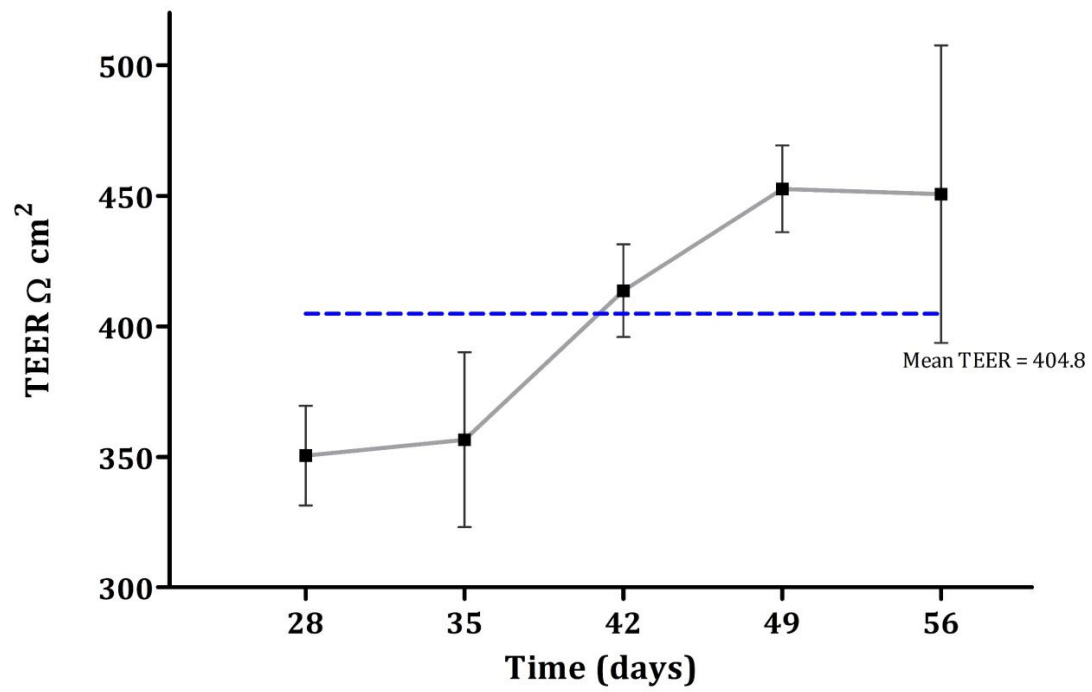

Supplement: bmjophth-2022-000981supp010_data_supplement.pdf [file bmjophth-2022-000981supp010_data_supplement.pdf]
